# Supplementary material for: Community management of water resources for drinking water security: WASMO's approach.
Source: Royal Society of Chemistry journal article supplement (doi:10.1039/c7mt00184c), 2005-01-01
Supplement: c7mt00184c1.pdf [file c7mt00184c1.pdf]

## Supporting information

for

### Copper Finger Protein of Sp1: the Molecular Basis of Copper Sensing

Siming Yuan, Siming Chen, Zhaoyong Xi and Yangzhong Liu

#### Contents

**Figure S1.** Characterization of Cu(I) binding to Sp1.

**Figure S2.** The stability of  $[\text{Cu}(\text{CH}_3\text{CN})_4]^+$  in  $\text{CH}_3\text{CN}$  solution.

**Figure S3.** Substitution of Cu(I) coordination in  $[\text{Cu}(\text{BCA})_2]^{3-}$  complex by Sp1-zf2.

**Figure S4.** 2D NMR spectra of Cu-Atox1 with Sp1 addition and apo-Atox1.

**Figure S5.** Characterization of protein folding of Sp1 upon Zn(II) binding.

**Figure S6.** Characterization of protein folding of Sp1 upon Cu(I) binding.

**Figure S7.** The formation of Sp1/DNA complex.

**Figure S8.** Cu(I) inhibits the binding of Sp1 to *hCtr1* promoter.

**Figure S9.** The influence of DNA sequence to Zn-Sp1/DNA complexes.

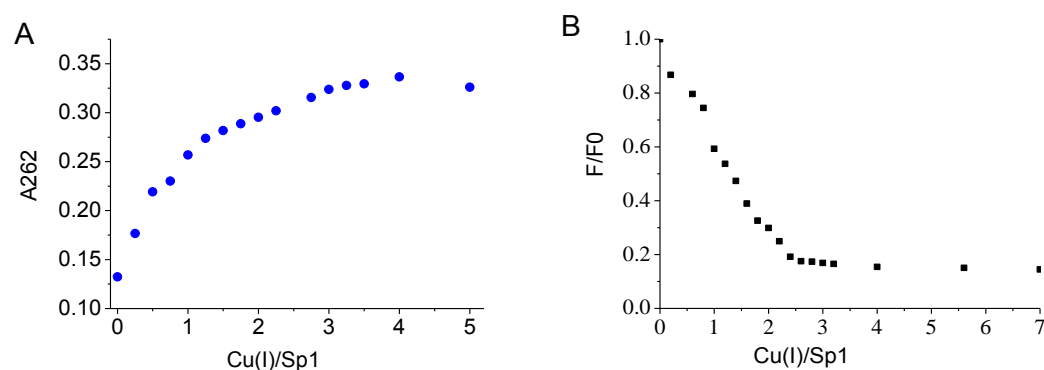

**Figure S1.** Characterization of Cu(I) binding to Sp1. (A) UV titration of Cu(I) to apo-Sp1; (B) Fluorescence titration of Cu(I) to apo-Sp1. All experiments were conducted on 10  $\mu$ M protein at 25°C in HEPES buffer containing 100 mM NaCl in the presence of 5 molar equivalents of TCEP.

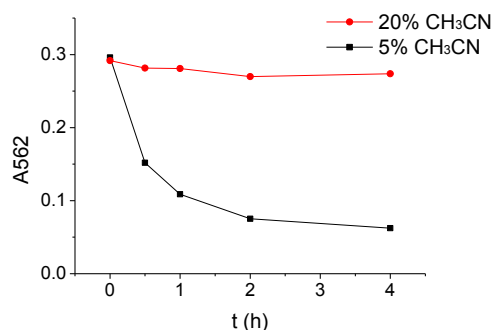

**Figure S2.** The stability of  $[\text{Cu}(\text{CH}_3\text{CN})_4]^+$  in  $\text{CH}_3\text{CN}$  solution. 50  $\mu$ M  $[\text{Cu}(\text{CH}_3\text{CN})_4]\cdot\text{PF}_6$  was dissolved in 5% or 20%  $\text{CH}_3\text{CN}$  (V/V), and samples were open to air in eppendorf tubes at 37 °C. After different incubation time, 200  $\mu$ M Cu(I) dye BCA was added and the UV absorption at 562 nm measured. The result showed that Cu(I) content gradually decreased in 5%  $\text{CH}_3\text{CN}$ , indicating the oxidation of  $[\text{Cu}(\text{CH}_3\text{CN})_4]^+$ . However,  $[\text{Cu}(\text{CH}_3\text{CN})_4]^+$  was rather stable in 20%  $\text{CH}_3\text{CN}$ ; ~ 93% copper remained Cu(I) state in 4 h.

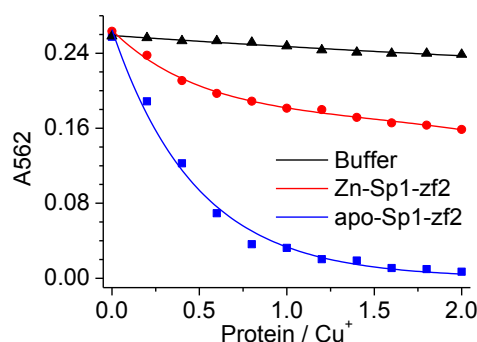

**Figure S3.** The substitution of Cu(I) coordination in  $[\text{Cu}(\text{BCA})_2]^{3-}$  complex by Sp1-zf2. The color of curves denotes the apo-Sp1-zf2 (blue), Zn-Sp1-zf2 (red) and buffer control (black). Experiments were carried out on 40  $\mu$ M  $[\text{Cu}(\text{BCA})_2]^{3-}$  in 20 mM HEPES buffer containing 100 mM  $\text{NaNO}_3$ . 0.2 molar equivalent of protein was titrated in each aliquot and the UV absorbance at 562 nm was recorded.

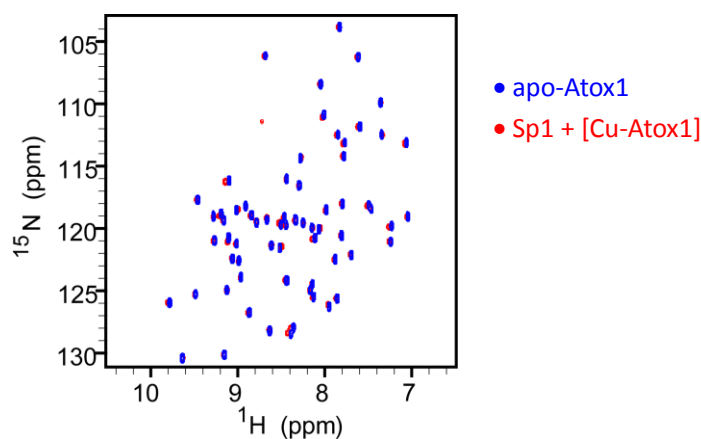

**Figure S4.** Superposition of 2D  $^1\text{H}$ - $^{15}\text{N}$  HSQC NMR spectra of apo-Atox1 (blue) and Cu-Atox1 with equimolar apo-Sp1 addition (red). NMR spectra were recorded at 298 K in 50 mM HEPES (pH=7.40) containing 100 mM NaCl. Two spectra are nearly identical, indicating the generation of apo-Atox1 in the reaction of Cu-Atox1 and Sp1.

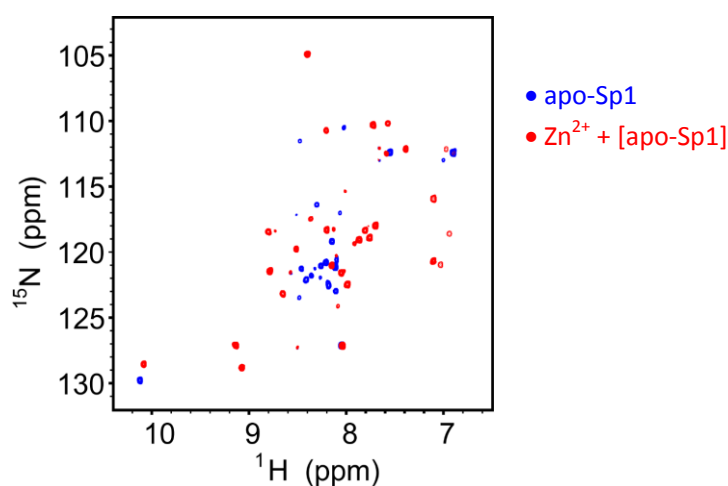

**Figure S5.** Superposition of 2D  $^1\text{H}$ - $^{15}\text{N}$  HSQC NMR spectra of apo-Sp1-zf2 before (blue) and after (red) the incubation with equimolar of Zn(II) ions.

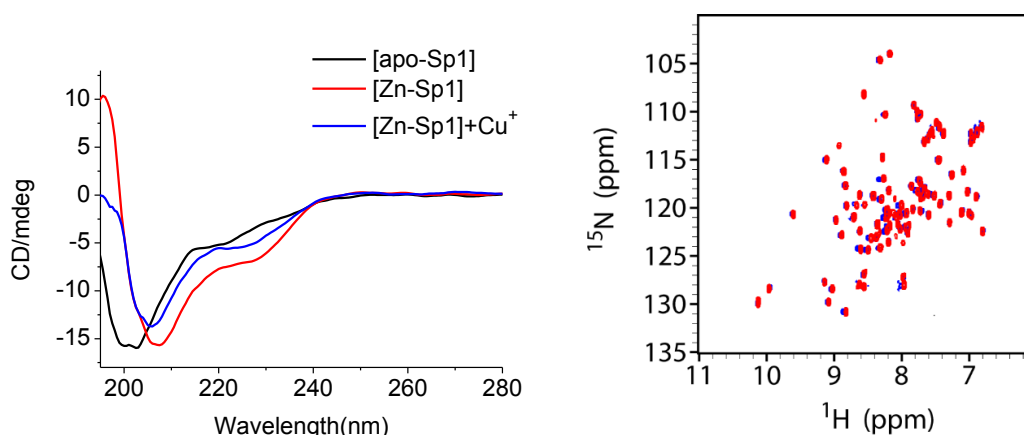

**Figure S6.** (A) Far-UV CD spectra of Sp1. Curves denote apo-Sp1 (black line), Zn-Sp1 (solid red line) and Zn-Sp1 with 3 equimolar  $\text{Cu}^+$  ions (blue line). (B) Superposition of 2D  $^1\text{H}$ - $^{15}\text{N}$  HSQC NMR spectra of Zn-Sp1 before (blue) and after (red) the incubation with 3 molar equivalents of Cu(I) ions.

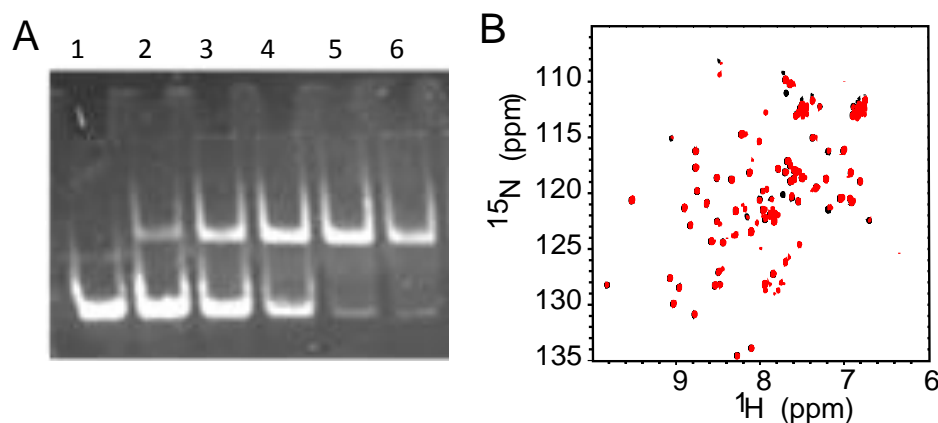

**Figure S7.** (A) The formation of Sp1/DNA complex. Lane 1: DNA control; Lanes 2-6: DNA was incubated with different molar equivalents of Zn-Sp1 (1, 2, 3, 4 and 5, respectively). (B) The superposition of 2D  $^1\text{H}$ - $^{15}\text{N}$  HSQC NMR spectra of Zn-Sp1 in the absence (black) and presence (red) of DNA.

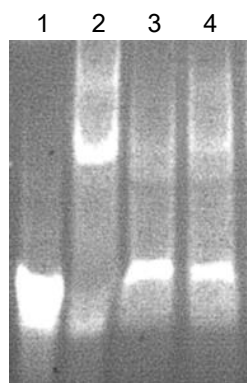

**Figure S8.** Cu(I) inhibits the binding of Sp1 to *hCtr1* promoter. Lane 1: DNA control; Lane 2: DNA/Sp1 complex; Lane 3: DNA/Sp1 complex incubated with 3 molar equivalents of Cu(I); Lane 4: Cu(I)-Sp1 incubated with DNA. Reactions were conducted in 50 mM HEPES buffer (pH 7.4) containing 100 mM NaCl in the presence of 0.2 mM GSH.

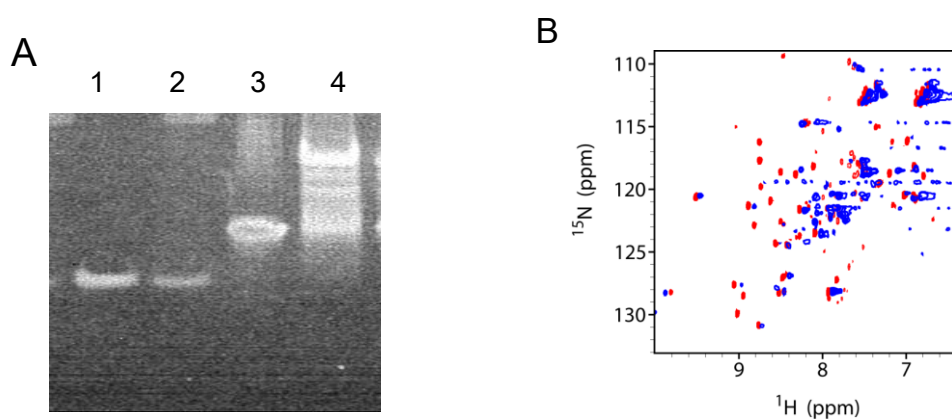

**Figure S9.** (A) The influence of DNA sequence to Zn-Sp1/DNA complexes. Lane 1: a scramble DNA; Lane 2: a scramble DNA with Zn-Sp1 addition; Lane 3: *hCtr1* promoter; Lane 4: *hCtr1* promoter with Zn-Sp1 addition. (B) Superposition of 2D  $^1\text{H}$ - $^{15}\text{N}$  HSQC NMR spectra of Zn-Sp1 with the addition of *hCtr1* promoter (red) and a scramble DNA sequence (blue). The scramble DNA sequence is AATTAGCTAATT. Samples were prepared with 30  $\mu\text{M}$  Zn-Sp1 and 10  $\mu\text{M}$  DNA in 50 mM HEPES (pH=7.40) containing 100 mM NaCl. NMR spectra were recorded at 298 K.
